# Supplementary material
Source: publisher figshare collection journal article supplement (https://gsapubs.figshare.com/ndownloader/files/27692760)
Supplement: Supplementary file 1 [file 27692760]

## Sheet: G48729
Greenberg, E., Ganti, V., and Hajek, E., 2021, Quantifying bankfull flow width using preserved bar clinoforms from fluvial strata: Geology, v. 49, https://doi.org/10.1130/G48729.1

## Sheet: Table DR1
		Table DR1:	Data Sources
		River	Upstream Latitude	Upstream Longitude	Downstream Latitude	Downstream Longitude	Collection Date	DEM Resolution	Reach Length
		Mississippi River	31.4882	-91.5165	30.4406	-91.1914	2002-11-01	5m	183km
		White River	39.3827	-86.5279	39.3396	-86.7074	2012-02-01	15ft	65km
		Koyukuk River	85.4615	-157.588	64.9573	-157.533	2012-2016	2m	153m
		Trinity River	30.1863	-94.8401	29.9968	-94.8126	2015-08-01	1m	35km
		Powder River	45.3793	-105.453	45.227	-105.709	2016-09-01	1m	59km
		Red River	33.5591	-94.0175	33.1827	-93.7554	2017-02-01	1m	113km
		Brazos	31.2152	-96.9066	30.384	-96.2935	2011	1m	93km
		Tombigbee River	31.4461	-87.9176	31.2039	-87.9501	2008	1m	70km
		Rio Grande	25.926	-97.5452	25.9215	-97.3381	2011	72cm	74km
		Nestucca	45.2738	-123.834	45.2103	-123.884	2007-03-01	2m	19km
		Sacramento	39.6798	-121.962	39.4905	-122.002	2018	1m	38km

## Sheet: Table DR2
Table DR2:	River Data
River	Depth, h (m)	Width, B (m)	Bed Slope	Transverse Bed Slope, dy/dn	Radius of Curvature, R	R/ h
Mississippi	22-242	9581	.000116	0.04517	286416	190.783
White	2.44	1591	.000216	0.16817	23216	140.8
Koyukuk	9.416	4171	.000116	0.04317	155216	165.106
Trinity	12.29	1851	.000116	0.08517	57116	48.4426
Powder	410	841	.001516	0.22117	23116	11.75
Red	1011	2011	.000516	0.12917	165716	182.6
Brazos	1112	1741	.000316	0.11217	44316	59.4545
Grande	813	931	.000116	0.16217	26016	25
Tombigbee	1514	3171	.000116	0.04417	65216	43.8667
Nestucca	2.516	861	.000216	0.33717	14816	59.2
Sacramento	6-1215	1431	.000216	0.070717	36816	44
	1	Calculated with the methods outlined in Modern Analysis (this paper)
	2	Leclair (2011)
	4	Indiana Divison of Fish and Wildlife (2004)
	5	Smith and Mohrig (2017)
	6	Pizzuto et al (2008)
	7	Folk and Ward (1957)
	8	Stanley and Randazzo (2001)
	9	Phillips et al. (2005)
	10	Moody and Meade (1990)
	11	Thorne (1991)
	12	Phillips (2013)
	13	Swartz et al. (2020)
	14	Army Crops of Engineers (1981)
	15	Brice (1977)
	16	Calculated with the methods outlined in Supplement
	17	Measured following Talmon et al. (1995)

## Sheet: Table DR3
				Table DR3:	Bankfull Discharge Statistics
				River	Median (m3/s)	15th Percentile (m3/s)	85th Percentline (m3/s)	Peakedness (-)a	DVIa (-)a	DVIc (-)a	DVIy (-)a
				Mississippi	18563.9	6972	31822	1.78758	1.44912	1.60244	1.66213
				White	147.953	23.843	261.647	1.7901	1.45541	7.01586	7.86722
				Koyukuk	414.51	15.008	889.148	3.75079	3.71391	6.93114	8.25417
				Trinity	563.39	169.901	953.002	1.3078	0.766731	3.92391	2.14593
				Powder	15.1539	2.20305	24.7772	2.71561	2.48533	6.91277	7.32272
				Red	362.838	65.412	705.088	1.80078	1.37109	11.8487	7.0224
				Brazos	-	-	-	-	-	-	-
				Grande	-	-	-	-	-	-	-
				Tombigbee	822.153	113.834	1710.34	2.09909	1.8208	5.86203	5.23111
				Nestucca	29.6791	2.56578	56.6336	2.05419	1.96876	4.41916	9.75918
				Sacramento	537.501	209.544	959.94	1.71684	1.21314	3.77291	3.01323
				a	Calcualted following Hansford et al. (2020)

## Sheet: Table DR4
		Table DR4	Literature Sources
		River	Channel Width (m)	Bar Width (m)	Source
		Colville	500	150	Tye (2004)
		Kuparuk	560	200	Tye (2004)
		Sagavanirktok	530	140	Tye (2004)
		Rio Beni	113.5	72.5	Gautier et al. (2010)
		Pulmanki River	55	33	Kasvi et al. (2017) and Lotsari et al. (2014)
		Lower Mississippi River	744-1015	400	Andreadis et al. (2013) and Wang and Xu (2018)
		Rio Grande Near hidalgo, TX	50	41	Swartz et al. (2020)
		Amargosa River	11.5	7	Ielpi (2019)
		Lower Huanghe River	320	253	Ganti et al. (2014)
		Strickland	356	233	Swanson et al. (2008)

## Sheet: Table DR5
		Table DR5	Published Panels for Ancient Fluvial Deposits
		Deposit Name	Location	Age	Mud-Plug Width (m)	Clinoform Width (m)	Predicted Channel Width (m)	Source
		Beaufort Group	Karoo Basin, South Africa	Permian	301	124	303 ± 27	Wilson et al (2014): Figure 6
		Joggins Formation	Cumberland Basin, Canada	Pennsylvanian	23.2	11.1	27 ± 2.4	Rygel and Gibling (2006): Figure 8
		Scalby Formation	Cleveland Basin, United Kingdom	Jurassic	63	40	98 ± 9	Ielpi and Ghinassi (2014): Figure 6
		Huesca Fan	Ebro Basin, Spain	Miocene	27.8	15	35.3 ± 1.7	Donselaar and Overeem (2008): Figures 5 and 7
		McMurray Formation	Alberta Forland Basin, Canada	Cretaceous	719.7	363	853.9 ± 41.2	Durkin et al. (2017): Figure 11
		Northern Shelf	South China Sea	Pleistocene	753	456	1072 ± 51.8	Zhuo et al. (2015): Figure 13
		Numerical Model	NAYS2D		171.9	76.7	180.4 ± 8.7	Van de Lageweg et al. (2015): Figure 5

## Sheet: Table DR6
		Table DR6: Table of all regression coeffieicents log and linear
		Model	Percentile	α - Point	α - Bend	α - Reach
		Equation (2)	0.025	2.228	2.028	1.807
		Equation (2)	0.5	2.328	2.168	2.128
		Equation (2)	0.975	2.438	2.312	2.5
				β - Point	α - Point	β - Bend	α - Bend	β - Reach	α - Reach
		Equation (S4)	0.025	0.777	4.227	0.819	2.685	0.805	1.175
		Equation (S4)	0.5	0.816	4.989	0.885	3.516	0.967	2.472
		Equation (S4)	0.975	0.856	5.916	0.948	4.688	1.128	5.42

## Sheet: Table DR7
Table DR7: All collected data
River	Bar Number	Cross-section Index	Easting	Northing	Channel width (m)	Bar width (m)
Brazos River	1	1_0	713012	3.43722e+06	230	220
Brazos River	1	1_1	713221	3.4371e+06	192	120
Brazos River	1	1_2	713372	3.43687e+06	319	140
Brazos River	2	2_1	711925	3.43487e+06	286	210
Brazos River	2	2_2	712059	3.4347e+06	224	200
Brazos River	2	2_4	712369	3.43464e+06	245	180
Brazos River	3	3_0	715212	3.43179e+06	378	220
Brazos River	3	3_1	715341	3.43153e+06	254	240
Brazos River	3	3_3	715355	3.43099e+06	322	220
Brazos River	3	3_4	715151	3.43076e+06	313	100
Brazos River	4	4_0	730248	3.40176e+06	192	80
Brazos River	4	4_1	730372	3.40162e+06	304	100
Brazos River	4	4_2	730453	3.40147e+06	283	110
Brazos River	4	4_4	730431	3.40117e+06	239	200
Brazos River	6	6_0	729840	3.39232e+06	295	170
Brazos River	6	6_1	729834	3.39225e+06	275	180
Brazos River	6	6_2	729869	3.39217e+06	224	150
Brazos River	6	6_3	729938	3.39211e+06	263	120
Brazos River	6	6_4	730016	3.39207e+06	230	190
Brazos River	7	7_0	744460	3.38763e+06	227	120
Brazos River	7	7_1	744521	3.38755e+06	236	220
Brazos River	7	7_2	744557	3.38747e+06	251	190
Brazos River	8	8_0	745997	3.38496e+06	283	200
Brazos River	8	8_1	746284	3.38488e+06	340	170
Brazos River	8	8_2	746566	3.385e+06	295	240
Brazos River	8	8_3	746808	3.38528e+06	275	170
Brazos River	9	9_0	746354	3.38702e+06	351	240
Brazos River	9	9_1	746440	3.38711e+06	215	100
Brazos River	9	9_2	746542	3.38715e+06	298	100
Brazos River	9	9_3	746646	3.38717e+06	248	140
Brazos River	9	9_4	746750	3.38715e+06	269	210
Brazos River	10	10_0	750705	3.38186e+06	233	230
Brazos River	10	10_1	750904	3.38198e+06	165	100
Brazos River	10	10_2	751110	3.38201e+06	351	80
Brazos River	10	10_3	751312	3.38191e+06	322	190
Brazos River	11	11_0	752160	3.37861e+06	334	190
Brazos River	11	11_1	752234	3.37843e+06	343	310
Brazos River	11	11_2	752362	3.37829e+06	343	220
Brazos River	11	11_3	752519	3.37822e+06	275	150
Brazos River	12	12_0	758354	3.37232e+06	269	150
Brazos River	12	12_1	758458	3.37233e+06	245	210
Brazos River	12	12_2	758562	3.37231e+06	292	220
Brazos River	12	12_3	758664	3.37224e+06	260	170
Brazos River	12	12_4	758740	3.37213e+06	292	190
Brazos River	13	13_0	760183	3.36433e+06	298	170
Brazos River	13	13_1	760222	3.36418e+06	304	200
Brazos River	13	13_2	760213	3.36403e+06	245	190
Brazos River	13	13_3	760160	3.36388e+06	272	210
Brazos River	13	13_4	760088	3.36373e+06	345	200
Koyukuk River	0	0_0	-1.0553e+06	2.55336e+06	416	206
Koyukuk River	0	0_2	-1.05687e+06	2.55256e+06	516	336
Koyukuk River	1	1_0	-1.0537e+06	2.54663e+06	662	265
Koyukuk River	1	1_1	-1.05404e+06	2.54752e+06	449	156
Koyukuk River	1	1_2	-1.05453e+06	2.54826e+06	387	196
Koyukuk River	1	1_3	-1.05544e+06	2.54861e+06	453	190
Koyukuk River	1	1_4	-1.05594e+06	2.54772e+06	333	70
Koyukuk River	2	2_0	-1.05594e+06	2.54772e+06	338	90
Koyukuk River	2	2_1	-1.05546e+06	2.54651e+06	453	236
Koyukuk River	2	2_3	-1.05648e+06	2.54492e+06	511	281
Koyukuk River	3	3_1	-1.05949e+06	2.54504e+06	284	90
Koyukuk River	3	3_3	-1.0614e+06	2.54286e+06	413	195
Koyukuk River	3	3_4	-1.06075e+06	2.54239e+06	302	140
Koyukuk River	4	4_0	-1.05587e+06	2.53971e+06	369	151
Koyukuk River	4	4_1	-1.05504e+06	2.53894e+06	418	200
Koyukuk River	4	4_3	-1.0528e+06	2.5397e+06	529	296
Koyukuk River	5	5_0	-1.04324e+06	2.53811e+06	240	115
Koyukuk River	6	6_5	-1.04232e+06	2.52629e+06	836	437
Koyukuk River	6	6_6	-1.04175e+06	2.5252e+06	369	125
Koyukuk River	6	6_7	-1.0405e+06	2.52458e+06	662	276
Koyukuk River	7	7_2	-1.03635e+06	2.5207e+06	542	55
Koyukuk River	8	8_0	-1.03635e+06	2.5207e+06	551	110
Koyukuk River	8	8_1	-1.03689e+06	2.52136e+06	458	176
Koyukuk River	9	9_0	-1.0344e+06	2.51422e+06	662	106
Koyukuk River	9	9_1	-1.03465e+06	2.51287e+06	444	166
Koyukuk River	9	9_2	-1.03455e+06	2.51159e+06	345	180
Koyukuk River	9	9_5	-1.03275e+06	2.51224e+06	582	166
Koyukuk River	10	10_1	-1.03171e+06	2.50744e+06	507	321
Koyukuk River	10	10_2	-1.03176e+06	2.50668e+06	471	250
Koyukuk River	11	11_1	-1.03158e+06	2.50379e+06	289	21
Koyukuk River	11	11_3	-1.03197e+06	2.50206e+06	347	121
Koyukuk River	12	12_0	-1.03197e+06	2.50206e+06	351	131
Koyukuk River	12	12_1	-1.03122e+06	2.50118e+06	587	196
Koyukuk River	12	12_2	-1.03015e+06	2.49989e+06	467	145
Koyukuk River	12	12_3	-1.03027e+06	2.49875e+06	449	140
Mississippi River	0	0_0	631467	3.44449e+06	1071	890
Mississippi River	0	0_1	631452	3.44401e+06	990	570
Mississippi River	0	0_2	631519	3.44353e+06	1063	580
Mississippi River	0	0_3	631665	3.44305e+06	1169	590
Mississippi River	0	0_4	631887	3.44261e+06	978	310
Mississippi River	1	1_0	630273	3.4591e+06	1542	1030
Mississippi River	1	1_5	629340	3.45737e+06	1252	535
Mississippi River	1	1_6	629507	3.45687e+06	1244	865
Mississippi River - Leclair	0	0_0	663572	3.39055e+06	854	150
Mississippi River - Leclair	0	0_1	663699	3.38984e+06	696	260
Mississippi River - Leclair	0	0_2	663609	3.38911e+06	675	235
Mississippi River - Leclair	0	0_3	663477	3.38856e+06	776	615
Mississippi River - Leclair	2	2_0	668746	3.38064e+06	879	190
Mississippi River - Leclair	2	2_1	668658	3.38013e+06	745	200
Mississippi River - Leclair	2	2_2	668090	3.37927e+06	721	240
Mississippi River - Leclair	2	2_3	667384	3.37873e+06	708	355
Mississippi River - Leclair	3	3_0	665862	3.37599e+06	752	225
Mississippi River - Leclair	3	3_1	666195	3.37599e+06	786	155
Mississippi River - Leclair	3	3_2	666938	3.37611e+06	838	325
Mississippi River - Leclair	3	3_3	667367	3.37623e+06	815	150
Mississippi River - Leclair	3	3_4	667813	3.37639e+06	908	250
Nestucca River	0	0_1	434720	5.01282e+06	22.5552	4.572
Nestucca River	0	0_2	434723	5.01281e+06	13.4112	4.2672
Nestucca River	0	0_3	434728	5.01276e+06	23.1648	4.572
Nestucca River	0	0_4	434726	5.01271e+06	24.6888	10.0584
Nestucca River	0	0_6	434711	5.01266e+06	14.6304	5.4864
Nestucca River	1	1_0	433869	5.01282e+06	16.4592	7.0104
Nestucca River	2	2_0	433448	5.01285e+06	33.8328	14.3256
Nestucca River	2	2_1	433446	5.01285e+06	33.8328	18.288
Nestucca River	2	2_3	433444	5.01285e+06	21.9456	6.7056
Nestucca River	3	3_0	433680	5.01186e+06	17.6784	8.5344
Nestucca River	4	4_0	433570	5.01039e+06	20.7264	16.764
Nestucca River	4	4_1	433572	5.01036e+06	18.5928	8.2296
Nestucca River	4	4_2	433567	5.01033e+06	21.6408	6.096
Nestucca River	4	4_3	433567	5.01033e+06	19.2024	10.3632
Nestucca River	4	4_4	433566	5.01033e+06	19.5072	10.9728
Nestucca River	4	4_5	433564	5.01033e+06	21.336	7.3152
Nestucca River	5	5_0	432178	5.01039e+06	10.0584	10.0584
Nestucca River	5	5_1	432175	5.0104e+06	15.8496	11.5824
Nestucca River	6	6_0	430883	5.00961e+06	18.8976	5.4864
Nestucca River	7	7_1	430554	5.00855e+06	21.336	11.5824
Nestucca River	7	7_2	430567	5.00849e+06	17.9832	11.2776
Nestucca River	8	8_0	430737	5.00817e+06	18.288	14.0208
Nestucca River	8	8_1	430755	5.00809e+06	14.9352	14.3256
Nestucca River	8	8_2	430755	5.00809e+06	15.5448	10.668
Nestucca River	8	8_3	430755	5.00805e+06	14.6304	7.9248
Nestucca River	8	8_4	430753	5.00801e+06	15.24	3.3528
Nestucca River	8	8_5	430747	5.00796e+06	14.0208	4.572
Nestucca River	9	9_0	430862	5.0076e+06	17.6784	4.2672
Nestucca River	10	10_0	430541	5.00683e+06	22.5552	10.668
Nestucca River	10	10_1	430540	5.00683e+06	25.2984	13.716
Nestucca River	10	10_2	430534	5.00679e+06	14.9352	5.4864
Nestucca River	10	10_3	430531	5.00676e+06	14.9352	4.572
Powder River	0	0_0	464120	5.02421e+06	63	13
Powder River	0	0_1	464064	5.02405e+06	61	17
Powder River	0	0_2	463914	5.02403e+06	50	27
Powder River	0	0_3	463674	5.02405e+06	57	51
Powder River	1	1_0	463588	5.02449e+06	61	33
Powder River	1	1_2	463413	5.02461e+06	62	46
Powder River	1	1_3	463324	5.02462e+06	60	29
Powder River	1	1_4	463259	5.02458e+06	62	41
Powder River	2	2_1	462987	5.02399e+06	64	43
Powder River	2	2_2	462986	5.02396e+06	61	21
Powder River	2	2_3	462988	5.02395e+06	63	32
Powder River	2	2_4	463004	5.02392e+06	73	45
Powder River	3	3_0	463281	5.02401e+06	60	38
Powder River	3	3_1	463286	5.02402e+06	53	38
Powder River	3	3_2	463305	5.02404e+06	54	41
Powder River	3	3_3	463377	5.02406e+06	68	48
Powder River	3	3_4	463444	5.024e+06	57	17
Powder River	4	4_0	462958	5.02367e+06	75	45
Powder River	4	4_1	462950	5.02368e+06	75	34
Powder River	5	5_0	461777	5.02417e+06	59	19
Powder River	5	5_1	461678	5.02427e+06	65	22
Powder River	5	5_2	461599	5.02429e+06	57	22
Powder River	6	6_0	461104	5.0243e+06	75	56
Powder River	6	6_1	461091	5.02429e+06	76	54
Powder River	6	6_2	461034	5.02424e+06	75	46
Powder River	6	6_3	461029	5.02423e+06	70	67
Powder River	6	6_4	461016	5.02419e+06	65	38
Powder River	6	6_5	461016	5.02411e+06	69	22
Powder River	6	6_7	461025	5.02404e+06	75	33
Powder River	7	7_0	461137	5.02372e+06	64	17
Powder River	7	7_1	461089	5.02357e+06	70	31
Powder River	7	7_2	461025	5.0235e+06	69	28
Powder River	7	7_3	460889	5.02347e+06	74	50
Powder River	8	8_0	460483	5.02375e+06	71	56
Powder River	9	9_0	460536	5.02324e+06	68	20
Powder River	9	9_1	460522	5.02315e+06	59	8
Powder River	9	9_2	460506	5.02311e+06	69	47
Powder River	10	10_0	460250	5.02152e+06	74	33
Powder River	10	10_1	460201	5.02138e+06	58	15
Powder River	10	10_2	460072	5.02125e+06	57	15
Powder River	10	10_3	459992	5.02118e+06	57	24
Powder River	10	10_4	459880	5.02114e+06	69	18
Powder River	11	11_0	457994	5.02074e+06	61	23
Powder River	11	11_1	458010	5.02068e+06	62	21
Powder River	11	11_2	458063	5.02055e+06	61	30
Powder River	11	11_3	458124	5.0205e+06	62	13
Powder River	11	11_4	458210	5.02048e+06	66	37
Powder River	12	12_1	458752	5.02026e+06	67	43
Powder River	12	12_2	458716	5.02023e+06	66	57
Powder River	13	13_1	457809	5.01942e+06	57	22
Powder River	14	14_0	457957	5.01984e+06	68	26
Powder River	14	14_1	457951	5.01997e+06	65	19
Powder River	14	14_2	457946	5.01998e+06	65	34
Powder River	14	14_3	457929	5.02001e+06	77	24
Powder River	14	14_4	457830	5.02006e+06	81	22
Powder River	15	15_0	457466	5.01953e+06	70	19
Powder River	15	15_1	457451	5.01947e+06	64	19
Powder River	15	15_2	457375	5.01937e+06	55	34
Powder River	16	16_0	456906	5.01967e+06	64	12
Powder River	16	16_1	456667	5.01972e+06	73	12
Powder River	16	16_4	456487	5.01932e+06	56	27
Powder River	17	17_0	455389	5.01933e+06	55	38
Powder River	17	17_1	455148	5.01919e+06	56	16
Powder River	17	17_3	455052	5.01885e+06	73	49
Powder River	18	18_0	455187	5.01681e+06	66	52
Powder River	18	18_1	455131	5.0168e+06	66	54
Powder River	18	18_3	455055	5.01681e+06	56	29
Powder River	18	18_4	455043	5.01682e+06	57	22
Powder River	19	19_0	450535	5.0131e+06	55	29
Powder River	19	19_2	450374	5.01297e+06	65	27
Powder River	19	19_3	450350	5.0127e+06	75	41
Powder River	20	20_0	446208	5.00984e+06	78	22
Powder River	20	20_1	446184	5.00977e+06	84	36
Powder River	20	20_2	446186	5.00975e+06	90	14
Powder River	20	20_3	446211	5.00969e+06	90	38
Powder River	21	21_0	444227	5.00841e+06	63	29
Powder River	21	21_1	444180	5.00836e+06	86	32
Powder River	21	21_2	444169	5.00835e+06	63	29
Powder River	21	21_3	444125	5.00826e+06	99	58
Powder River	21	21_4	444114	5.00822e+06	95	53
Powder River	21	21_5	444112	5.00821e+06	99	35
Powder River	21	21_6	444126	5.00815e+06	55	38
Red River	0	0_0	405739	3.71387e+06	273	80
Red River	0	0_1	405921	3.714e+06	255	71
Red River	0	0_2	406101	3.71414e+06	285	70
Red River	0	0_3	406287	3.71426e+06	274	55
Red River	0	0_4	406490	3.71435e+06	307	84
Red River	1	1_0	408168	3.71407e+06	344	195
Red River	1	1_1	408242	3.71364e+06	248	226
Red River	1	1_2	408199	3.7132e+06	219	114
Red River	1	1_3	408044	3.71278e+06	172	65
Red River	1	1_4	407789	3.71241e+06	169	82
Red River	2	2_0	407578	3.71132e+06	184	109
Red River	2	2_1	408069	3.71103e+06	172	71
Red River	2	2_2	408628	3.71097e+06	163	70
Red River	2	2_3	409077	3.7113e+06	150	52
Red River	2	2_4	409342	3.71181e+06	176	81
Red River	3	3_1	413064	3.71276e+06	229	65
Red River	3	3_2	413171	3.71328e+06	195	125
Red River	3	3_3	413061	3.71382e+06	214	105
Red River	3	3_4	412855	3.71433e+06	328	127
Red River	6	6_0	431737	3.70714e+06	411	232
Red River	6	6_4	432242	3.7062e+06	246	182
Red River	7	7_2	432469	3.70345e+06	266	73
Red River	7	7_3	432284	3.70332e+06	211	76
Red River	7	7_4	432099	3.70319e+06	200	63
Red River	8	8_0	434244	3.68921e+06	334	66
Red River	8	8_1	434503	3.68914e+06	291	76
Red River	8	8_2	434802	3.68915e+06	218	88
Red River	8	8_3	435101	3.68917e+06	206	79
Red River	8	8_4	435395	3.68922e+06	283	80
Red River	9	9_0	435045	3.68573e+06	227	99
Red River	9	9_1	435166	3.68536e+06	300	277
Red River	9	9_2	435465	3.6851e+06	325	133
Red River	9	9_3	435770	3.68484e+06	287	91
Red River	10	10_1	434232	3.68201e+06	302	84
Red River	10	10_2	433888	3.68234e+06	297	167
Red River	10	10_3	433662	3.68279e+06	230	65
Red River	11	11_2	432007	3.68178e+06	223	96
Red River	11	11_3	432494	3.6811e+06	226	88
Red River	12	12_0	429351	3.67176e+06	314	42
Red River	12	12_1	429146	3.67168e+06	229	98
Red River	12	12_2	429007	3.67151e+06	252	86
Red River	12	12_3	428935	3.6713e+06	200	81
Rio Grande River	0	0.0_0	645971	2.86785e+06	56	36
Rio Grande River	0	0.0_1	645932	2.86775e+06	70	32
Rio Grande River	0	0.0_2	645938	2.86765e+06	67	28
Rio Grande River	0	0.0_3	645979	2.8676e+06	68	26
Rio Grande River	1	1.0_0	646954	2.86635e+06	145	16
Rio Grande River	2	2.0_0	650325	2.86524e+06	134	28
Rio Grande River	2	2.0_1	650393	2.8653e+06	112	22
Rio Grande River	2	2.0_2	650466	2.8653e+06	56	45
Rio Grande River	3	3.0_0	650559	2.86338e+06	93	33
Rio Grande River	3	3.0_1	650620	2.86329e+06	102	51
Rio Grande River	4	4.0_0	651477	2.8638e+06	58	39
Rio Grande River	4	4.0_1	651530	2.8638e+06	51	28
Rio Grande River	4	4.0_2	651615	2.86372e+06	88	25
Rio Grande River	5	5.0_0	653223	2.86417e+06	137	31
Rio Grande River	5	5.0_1	653345	2.86419e+06	89	47
Rio Grande River	5	5.0_2	653426	2.8641e+06	48	35
Rio Grande River	7	7.0_0	654640	2.86223e+06	60	40
Rio Grande River	7	7.0_1	654635	2.86216e+06	70	35
Rio Grande River	7	7.0_2	654679	2.86201e+06	88	48
Rio Grande River	7	7.0_3	654761	2.86194e+06	80	46
Rio Grande River	8	8.0_0	655792	2.86203e+06	44	35
Rio Grande River	8	8.0_1	655811	2.8619e+06	53	42
Rio Grande River	9	9.0_0	655741	2.86062e+06	184	29
Rio Grande River	9	9.0_1	655862	2.86052e+06	134	32
Rio Grande River	10	10.0_0	658912	2.85903e+06	58	48
Rio Grande River	10	10.0_1	659096	2.85917e+06	95	21
Rio Grande River	11	11.0_0	659334	2.86136e+06	57	36
Rio Grande River	11	11.0_1	659434	2.86137e+06	57	55
Rio Grande River	11	11.0_2	659505	2.86132e+06	45	29
Rio Grande River	12	12.0_0	659428	2.86099e+06	76	19
Rio Grande River	12	12.0_1	659411	2.86088e+06	46	37
Rio Grande River	13	13.0_0	659574	2.85953e+06	75	32
Rio Grande River	13	13.0_1	659760	2.85955e+06	115	19
Rio Grande River	13	13.0_2	659810	2.85967e+06	85	24
Rio Grande River	14	14.0_0	659746	2.85894e+06	88	41
Rio Grande River	14	14.0_1	659684	2.8589e+06	102	24
Rio Grande River	14	14.0_2	659678	2.85883e+06	71	50
Rio Grande River	15	15.0_0	661318	2.85882e+06	78	32
Rio Grande River	15	15.0_1	661484	2.85902e+06	73	52
Rio Grande River	16	16.0_0	661651	2.85929e+06	208	47
Rio Grande River	16	16.0_1	661790	2.85926e+06	77	31
Rio Grande River	17	17.0_0	663137	2.85963e+06	87	23
Rio Grande River	17	17.0_1	663135	2.85973e+06	100	24
Rio Grande River	17	17.0_2	663152	2.85983e+06	128	38
Rio Grande River	17	17.0_3	663236	2.86e+06	112	32
Rio Grande River	17	17.0_4	663314	2.86007e+06	104	37
Rio Grande River	17	17.0_5	663511	2.86014e+06	179	48
Rio Grande River	18	18.0_0	662838	2.86054e+06	112	31
Rio Grande River	18	18.0_1	662760	2.86057e+06	157	55
Rio Grande River	20	20.0_0	664267	2.86338e+06	144	55
Rio Grande River	20	20.0_1	664189	2.86334e+06	166	73
Rio Grande River	21	21.0_0	664445	2.86412e+06	130	44
Rio Grande River	21	21.0_1	664543	2.86417e+06	99	32
Rio Grande River	22	22.0_0	663829	2.86452e+06	76	23
Rio Grande River	22	22.0_1	663667	2.8646e+06	104	49
Rio Grande River	22	22.0_2	663608	2.86467e+06	92	37
Rio Grande River	22	22.0_3	663565	2.86478e+06	103	62
Rio Grande River	22	22.0_4	663550	2.8649e+06	92	33
Rio Grande River	23	23.0_0	662824	2.86656e+06	218	60
Rio Grande River	23	23.0_1	662911	2.86664e+06	138	35
Rio Grande River	23	23.0_2	663016	2.86666e+06	159	29
Rio Grande River	24	24.0_0	663379	2.8667e+06	113	40
Rio Grande River	24	24.0_1	663414	2.86676e+06	110	28
Rio Grande River	24	24.0_2	663415	2.86686e+06	118	34
Rio Grande River	25	25.0_0	666455	2.86805e+06	76	46
Rio Grande River	25	25.0_1	666521	2.86791e+06	90	48
Rio Grande River	25	25.0_2	666831	2.86798e+06	112	30
Sacramento River	0	0_0	586125	4.39153e+06	372	126
Sacramento River	0	0_1	586326	4.39159e+06	310	92
Sacramento River	0	0_2	586848	4.39168e+06	153	29
Sacramento River	0	0_3	586050	4.39148e+06	209	54
Sacramento River	0	0_4	585951	4.39134e+06	147	42
Sacramento River	0	0_5	585930	4.39123e+06	223	54
Sacramento River	0	0_6	588162	4.39088e+06	308	76
Sacramento River	0	0_7	588420	4.39078e+06	235	76
Sacramento River	0	0_8	587862	4.39076e+06	188	22
Sacramento River	0	0_9	586002	4.39084e+06	188	64
Sacramento River	0	0_10	588486	4.39067e+06	161	91
Sacramento River	1	1_0	586929	4.38919e+06	164	42
Sacramento River	1	1_1	586788	4.38908e+06	197	113
Sacramento River	1	1_2	587850	4.38915e+06	172	10
Sacramento River	1	1_4	588099	4.38915e+06	141	51
Sacramento River	1	1_5	586719	4.38893e+06	241	48
Sacramento River	2	2_0	586803	4.38644e+06	259	16
Sacramento River	2	2_1	586857	4.38635e+06	255	64
Sacramento River	2	2_2	587034	4.38613e+06	164	124
Sacramento River	3	3_0	587829	4.38553e+06	233	191
Sacramento River	4	4_0	586725	4.37947e+06	348	170
Sacramento River	6	6_0	585852	4.37238e+06	332	139
Sacramento River	6	6_3	586479	4.37245e+06	188	84
Sacramento River	6	6_5	585624	4.37215e+06	259	111
Sacramento River	6	6_6	585594	4.37199e+06	303	104
Sacramento River	6	6_7	585627	4.37181e+06	310	155
Tombigbee River	0	0.0_0	411207	3.47891e+06	381	181
Tombigbee River	0	0.0_1	411045	3.47863e+06	254	133
Tombigbee River	0	0.0_3	412770	3.47814e+06	470	172
Tombigbee River	0	0.0_4	412776	3.47814e+06	546	115
Tombigbee River	1	1.0_0	413160	3.47628e+06	300	77
Tombigbee River	1	1.0_1	412959	3.47609e+06	601	248
Tombigbee River	2	2.0_1	413487	3.47515e+06	322	192
Tombigbee River	2	2.0_3	412764	3.47496e+06	593	297
Tombigbee River	2	2.0_4	413766	3.4749e+06	271	67
Tombigbee River	5	5.0_3	409434	3.46495e+06	317	143
Tombigbee River	5	5.0_4	408228	3.46471e+06	241	96
Tombigbee River	5	5.0_7	411612	3.46426e+06	326	133
Tombigbee River	5	5.0_9	408294	3.46406e+06	194	144
Tombigbee River	5	5.0_10	408447	3.46383e+06	190	172
Tombigbee River	5	5.0_11	408672	3.46357e+06	271	58
Tombigbee River	7	7.0_0	409485	3.45253e+06	279	192
Tombigbee River	8	8.0_0	410157	3.44803e+06	411	248
Tombigbee River	8	8.0_2	409416	3.44785e+06	275	267
Tombigbee River	8	8.0_5	408297	3.44782e+06	351	325
Tombigbee River	9	9.0_0	407295	3.44792e+06	339	297
Tombigbee River	9	9.0_1	410157	3.44803e+06	389	76
Tombigbee River	9	9.0_4	408297	3.44782e+06	347	324
Tombigbee River	9	9.0_5	409731	3.44779e+06	317	268
Trinity River	0	0_0	324959	3.32062e+06	141	92
Trinity River	0	0_1	324586	3.32047e+06	179	74
Trinity River	3	3_0	324308	3.32209e+06	154	31
Trinity River	3	3_1	324343	3.32239e+06	180	133
Trinity River	4	4_1	323827	3.32308e+06	174	122
Trinity River	5	5_0	324052	3.32471e+06	187	57
Trinity River	5	5_1	323463	3.32513e+06	138	54
Trinity River	5	5_2	323336	3.32542e+06	182	179
Trinity River	6	6_0	324253	3.32615e+06	139	18
Trinity River	6	6_2	324738	3.32652e+06	198	48
Trinity River	7	7_0	324493	3.32687e+06	236	95
Trinity River	7	7_1	324504	3.32725e+06	195	148
Trinity River	8	8_0	324223	3.32747e+06	154	84
Trinity River	12	12_0	324556	3.33055e+06	267	30
Trinity River	12	12_1	324540	3.331e+06	215	107
Trinity River	15	15_0	325344	3.33223e+06	210	107
Trinity River	16	16_0	325274	3.33263e+06	188	106
Trinity River	16	16_1	325047	3.33285e+06	240	177
Trinity River	18	18_0	324008	3.33411e+06	190	78
Trinity River	19	19_1	325334	3.33429e+06	199	113
Trinity River	19	19_2	325576	3.33457e+06	142	103
Trinity River	20	20_0	325024	3.33466e+06	188	113
Trinity River	20	20_1	324511	3.33505e+06	292	149
Trinity River	21	21_0	325798	3.33554e+06	202	132
Trinity River	23	23_0	325693	3.33863e+06	219	119
Trinity River	25	25_0	322566	3.34077e+06	199	153
White River	0	0_0	528396	4.35355e+06	88	35
White River	0	0_1	528456	4.35349e+06	74	35
White River	0	0_2	524022	4.35347e+06	105	85
White River	0	0_3	528507	4.35344e+06	132	34
White River	1	1_0	531582	4.35552e+06	99	63
White River	1	1_1	531144	4.35547e+06	79	49
White River	2	2_0	534300	4.35744e+06	105	84
White River	2	2_2	534198	4.35725e+06	124	75
White River	2	2_4	534171	4.35716e+06	147	61
White River	3	3_0	534216	4.3573e+06	115	35
White River	3	3_1	534864	4.3573e+06	125	47
White River	3	3_2	534198	4.35725e+06	122	65
White River	3	3_3	534879	4.35728e+06	102	43
White River	4	4_0	543228	4.35955e+06	106	36
White River	4	4_1	540483	4.35942e+06	131	72
White River	5	5_0	543126	4.35947e+06	105	78
White River	5	5_1	539778	4.35939e+06	135	117
White River	5	5_2	540561	4.35934e+06	131	125
White River	5	5_3	539802	4.35932e+06	153	62
White River	6	6_1	553032	4.37141e+06	105	43
White River	6	6_2	554358	4.37146e+06	126	75
